# Supplementary material
Source: MDPI journal article supplement (https://www.mdpi.com/2073-4441/10/9/1226)
Supplement: s1 [file s1]

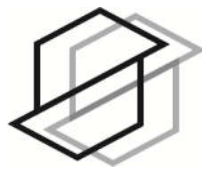

associated  
earth sciences  
incorporated

## GRAIN SIZE ANALYSIS - MECHANICAL ASTM D422

|                                          |                                    |                                      |                                                                |                        |
|------------------------------------------|------------------------------------|--------------------------------------|----------------------------------------------------------------|------------------------|
| Project Name<br><b>Cedar Grove</b>       | Project Number<br><b>KE140069A</b> | Date Sampled<br><b>5/12/2016</b>     | Date Tested<br><b>5/17/2016</b>                                | Tested By<br><b>MS</b> |
| Sample Source<br><b>Cedar Grove</b>      | Sample No.<br><b>75G255</b>        | Depth (ft)                           | Soil Description<br><b>SAND, trace silt, trace gravel (SP)</b> |                        |
| Total Sample Dry Wt. (g)<br><b>596.1</b> | Moisture Content (%)<br><b>4</b>   | D <sub>10</sub> (mm)<br><b>0.214</b> | Reference Specification                                        |                        |

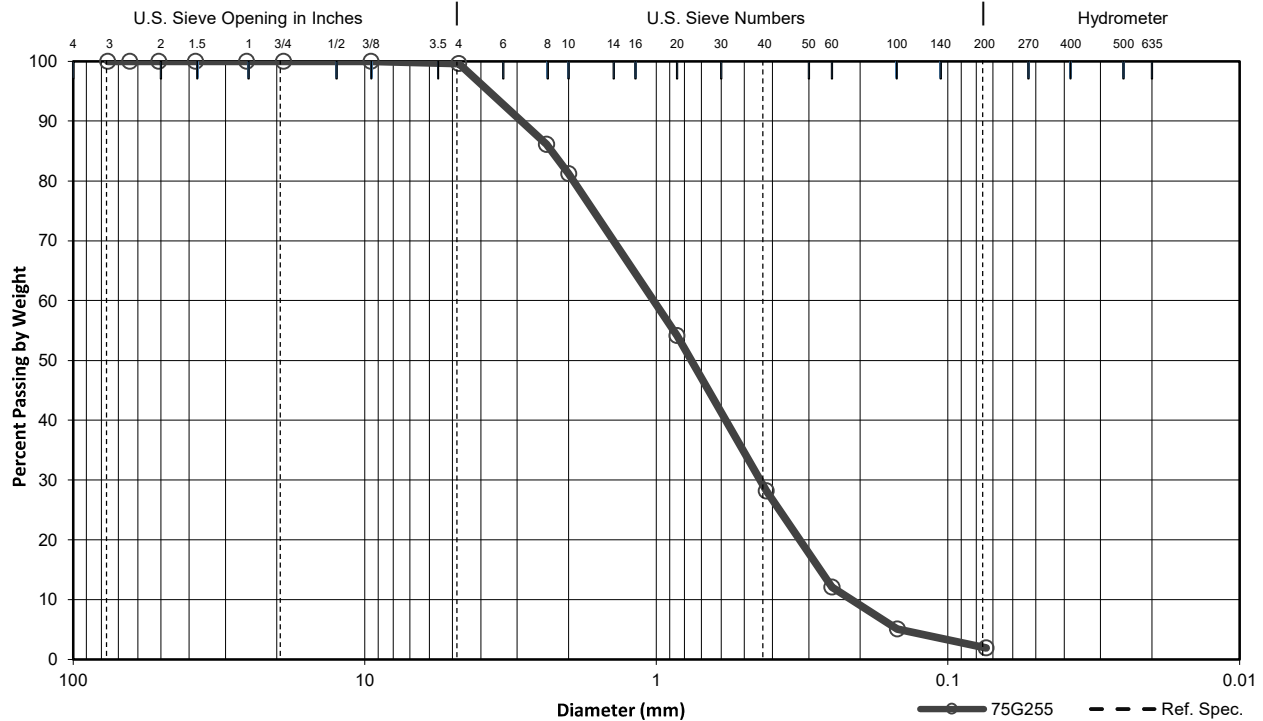

| Cobb. | Gravel |      | Sand   |        |      | Silt or Clay |
|-------|--------|------|--------|--------|------|--------------|
|       | Coarse | Fine | Coarse | Medium | Fine |              |

| Sieve No. | Diam. (mm) | Cum. Wt. Ret. (g) | % Ret. by Wt. | % Passing by Wt. | % Specs. Pass. by Wt. |     |
|-----------|------------|-------------------|---------------|------------------|-----------------------|-----|
|           |            |                   |               |                  | Min                   | Max |
| 3         | 76.1       |                   | 0.0           | 100.0            |                       |     |
| 2.5       | 64         |                   | 0.0           | 100.0            |                       |     |
| 2         | 50.8       |                   | 0.0           | 100.0            |                       |     |
| 1.5       | 38.1       |                   | 0.0           | 100.0            |                       |     |
| 1         | 25.4       |                   | 0.0           | 100.0            |                       |     |
| 3/4       | 19         |                   | 0.0           | 100.0            |                       |     |
| 3/8       | 9.51       |                   | 0.0           | 100.0            |                       |     |
| #4        | 4.76       | 2.3               | 0.4           | 99.6             |                       |     |
| #8        | 2.38       | 82.8              | 13.9          | 86.1             |                       |     |
| #10       | 2          | 112.1             | 18.8          | 81.2             |                       |     |
| #20       | 0.85       | 273.4             | 45.9          | 54.1             |                       |     |
| #40       | 0.42       | 428.2             | 71.8          | 28.2             |                       |     |
| #60       | 0.25       | 524.0             | 87.9          | 12.1             |                       |     |
| #100      | 0.149      | 565.7             | 94.9          | 5.1              |                       |     |
| #200      | 0.074      | 584.6             | 98.1          | 1.9              |                       |     |
|           |            |                   |               |                  |                       |     |
|           |            |                   |               |                  |                       |     |
|           |            |                   |               |                  |                       |     |
