# Supplementary material
Source: MDPI journal article supplement (https://www.mdpi.com/2073-4441/10/9/1226)
Supplement: s1 [file s1]

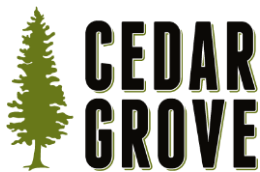

# Cedar Grove Composting Compost Quality Assurance Program 2016

## Cedar Grove Fine Grade Compost

Cedar Grove Compost is made from 100% locally recycled landscape and food trimmings, and clean wood waste. Cedar Grove Compost facilities are in compliance with Washington Department of Ecology (WDOE) requirements for compost process and product quality (WAC 173-350-220). Cedar Grove also voluntarily meets the US Composting Council's Seal of Testing Assurance (STA) and Washington Department of Transportation (WDOT) standards. Results of tests for horticultural values and applicable WDOT standards are shown in Chart 1. WDOE compost quality requirements and Cedar Grove Compost results are in Chart 2.

**Chart 1. Cedar Grove Fine Grade Compost Horticultural Values**

|                                              | WDOT Standard                     | Cedar Grove (2/5/2016)                           |
|----------------------------------------------|-----------------------------------|--------------------------------------------------|
| <b>Organic Matter</b>                        | >40%                              | <b>59.3%</b>                                     |
| <b>Carbon to Nitrogen Ratio</b>              | <25                               | <b>19</b>                                        |
| <b>Conductivity</b>                          | ≤4 mmhos/cm                       | <b>3.4 mmhos/cm</b>                              |
| <b>Seedling Emergence</b>                    | >80% of purified water            | <b>100%</b>                                      |
| <b>Seedling Vigor</b>                        | >80% of purified water            | <b>106% "Healthy"</b>                            |
| <b>pH</b>                                    | 6.0-8.5                           | <b>8.25</b>                                      |
| <b>Compost Stability</b>                     | <7 mg CO <sub>2</sub> /gr. OM/day | <b>3.5 mg CO<sub>2</sub>/gr. OM/day "Stable"</b> |
| <b>Dry weight</b>                            |                                   | <b>19 lbs / cu. ft.</b>                          |
| <b>Major Nutrients</b>                       |                                   |                                                  |
| Total Nitrogen                               |                                   | <b>1.9%</b>                                      |
| Phosphorous (P <sub>2</sub> O <sub>5</sub> ) |                                   | <b>.74%</b>                                      |
| Potassium (K <sub>2</sub> O)                 |                                   | <b>.79%</b>                                      |
| Sulfate                                      |                                   | <b>16 mg/kg</b>                                  |
| Calcium                                      |                                   | <b>2.0%</b>                                      |
| Magnesium                                    |                                   | <b>0.31%</b>                                     |

**Chart 2. Compost Quality Requirements - Washington Administrative Code 173-350 Sect. 220**

|                                 | WAC 173-350-220<br>Standard               | Cedar Grove<br>Compost (2/5/2016) |
|---------------------------------|-------------------------------------------|-----------------------------------|
| <b>Metals</b>                   | <i>Parts per million (mg/kg), dry wt.</i> |                                   |
| Arsenic                         | ≤20                                       | <b>7.9</b>                        |
| Cadmium                         | ≤10                                       | <b>&lt;1.0</b>                    |
| Copper                          | ≤750                                      | <b>61</b>                         |
| Lead                            | ≤150                                      | <b>29</b>                         |
| Mercury                         | ≤8                                        | <b>&lt;1.0</b>                    |
| Molybdenum                      | ≤9                                        | <b>1.4</b>                        |
| Nickel                          | ≤210                                      | <b>15</b>                         |
| Selenium                        | ≤18                                       | <b>&lt;1.0</b>                    |
| Zinc                            | ≤1400                                     | <b>160</b>                        |
| pH                              | 5-10 (range)                              | <b>8.25</b>                       |
| Salmonella (Pathogen indicator) | < 3 MPN / 4 grams of total solids         | <b>Pass</b>                       |
| Sharps                          | 0 percent                                 | <b>None Detected</b>              |
| Manufactured Inerts             | < 0.5 percent                             | <b>&lt;0.1 percent</b>            |

**Chart 3. WDOT Particle Size Specifications by Compost Grade**

| Sieve size | WDOT "Fine" Compost | Cedar Grove (2/5/2016) |
|------------|---------------------|------------------------|
| 1"         | 95-100%             | <b>100%</b>            |
| 5/8"       | 90-100%             | <b>100%</b>            |
| 1/4"       | 75-100%             | <b>75%</b>             |

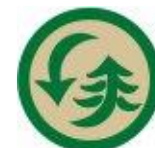

**US Composting Council**  
Seal of Testing Assurance

All tests performed by Soil Control Lab, Watsonville, CA; using TMECC/STA specified methods.
